# Supplementary material
Source: PubMed Central journal article supplement (PMC3756473)
Supplement: NIHMS504452-supplement-Suppl_Figs.pdf [file NIHMS504452-supplement-Suppl_Figs.pdf]

## Proliferation

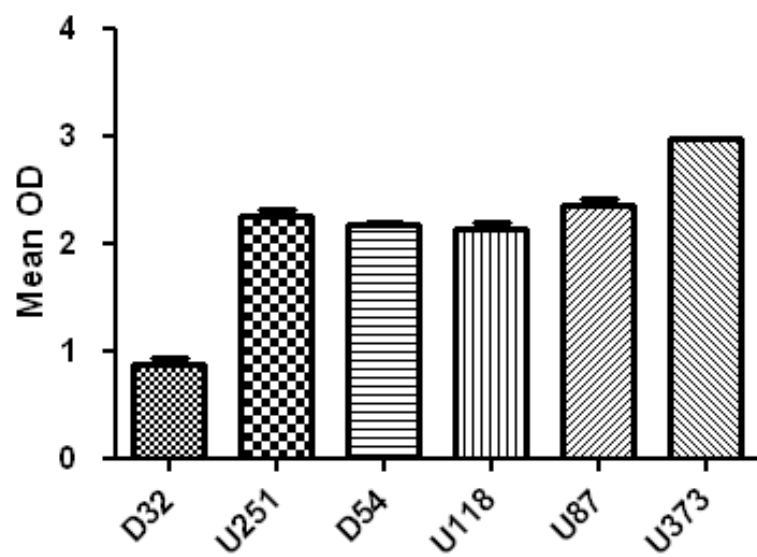

**A****U251 MARCKS Knockdown**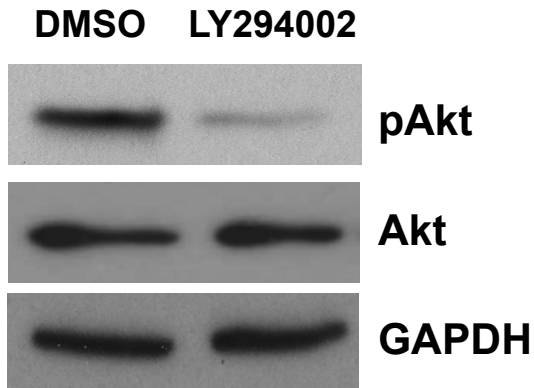**B****U251 MARCKS Knockdown**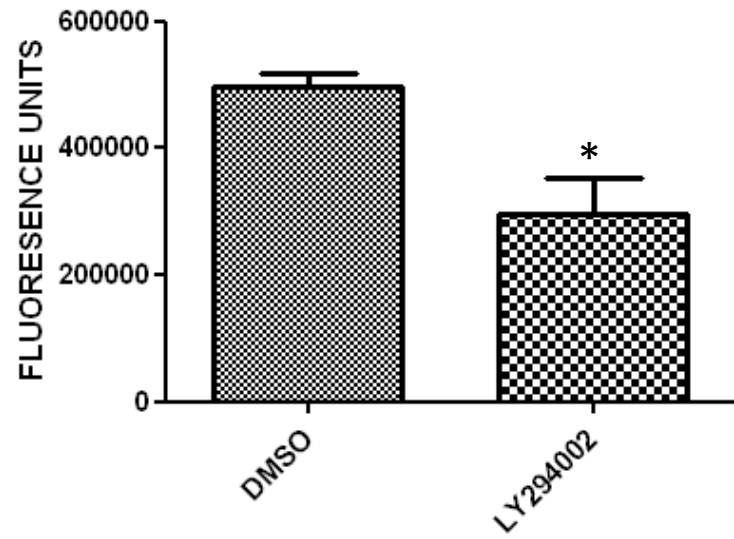**C**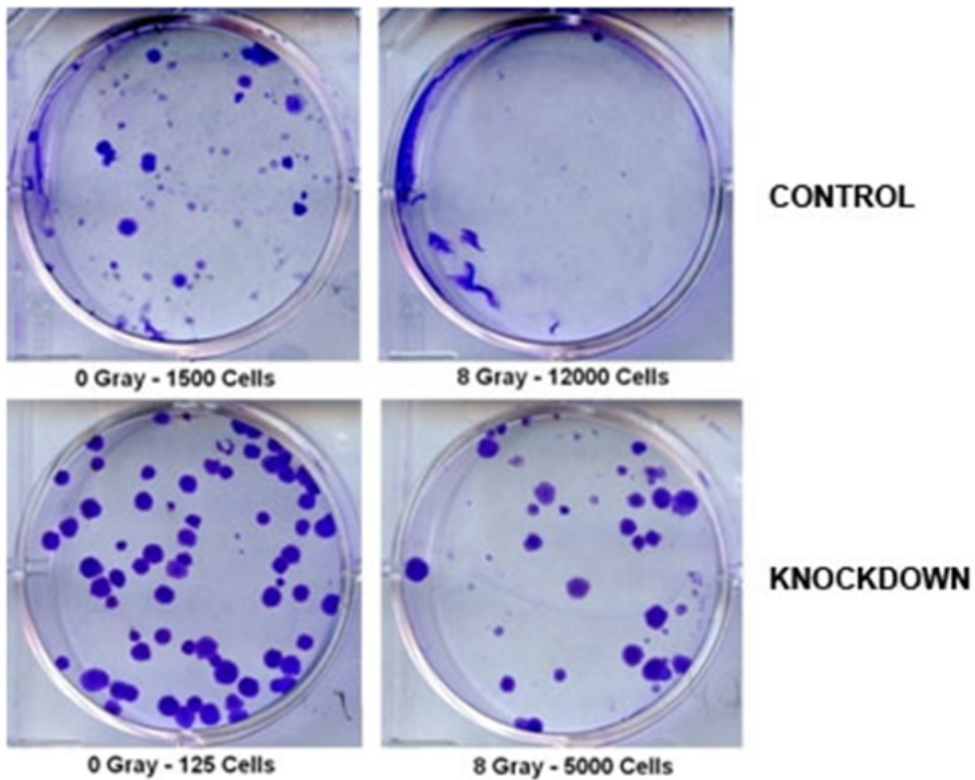

**A**

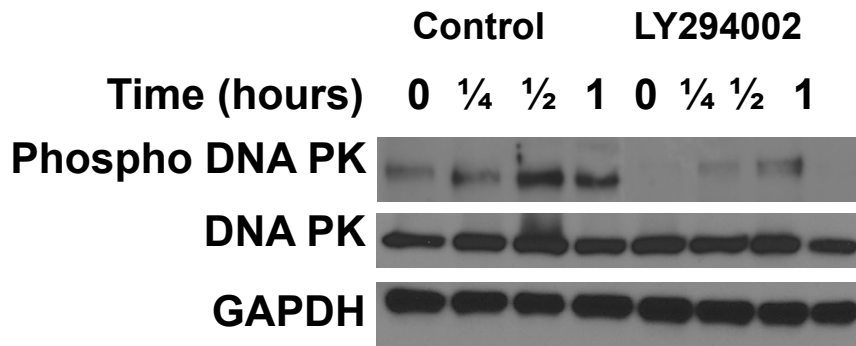

**B**

| PHASE | TIME | KNOCKDOWN           |                    | P VALUE            |
|-------|------|---------------------|--------------------|--------------------|
|       |      | CONTROL (%)         | (%)                |                    |
| G1    | 0HR  | 54.39 ± 1.370 N=3   | 51.21 ± 0.1815 N=3 | 0.0831             |
| G1    | 8HR  | 26.29 ± 0.4355 N=3  | 16.56 ± 0.4875 N=3 | <b>0.0001</b>      |
| G1    | 24HR | 34.82 ± 0.3122 N=3  | 45.30 ± 0.2021 N=3 | <b>&lt; 0.0001</b> |
| S     | 0HR  | 28.28 ± 1.133 N=3   | 31.00 ± 0.5150 N=3 | 0.0941             |
| S     | 8HR  | 29.96 ± 0.5871 N=3  | 32.97 ± 0.6296 N=3 | <b>0.0249</b>      |
| S     | 24HR | 5.727 ± 0.3567 N=3  | 14.01 ± 0.1898 N=3 | <b>&lt; 0.0001</b> |
| G2    | 0HR  | 17.33 ± 0.6317 N=3  | 17.80 ± 0.3686 N=3 | 0.5608             |
| G2    | 8HR  | 43.76 ± 0.3496 N=3  | 50.47 ± 1.008 N=3  | <b>0.0033</b>      |
| G2    | 24HR | 59.46 ± 0.06984 N=3 | 40.69 ± 0.3238 N=3 | <b>&lt; 0.0001</b> |

**C**

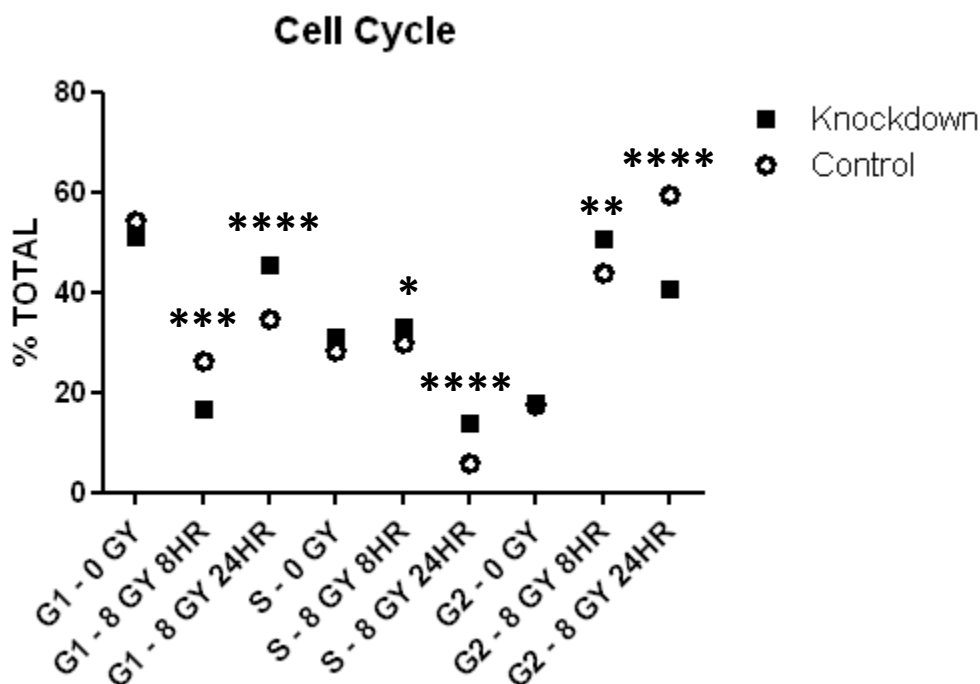

**CONTROL A**

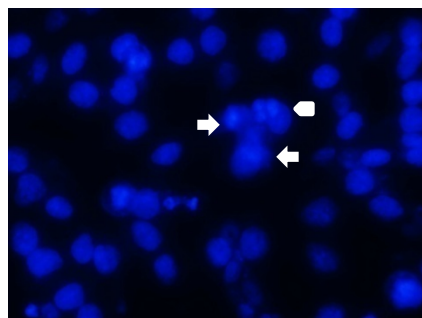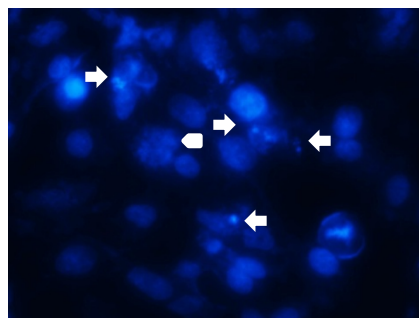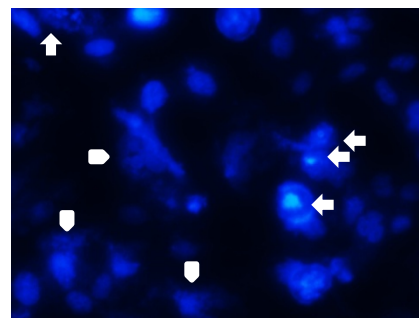

**KNOCKDOWN**

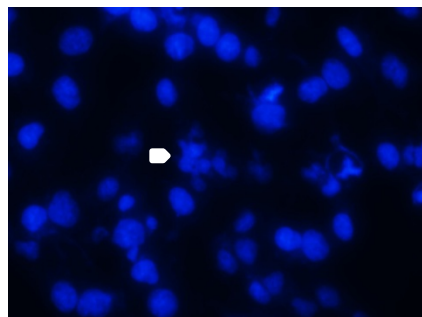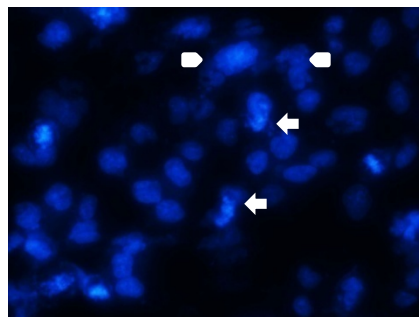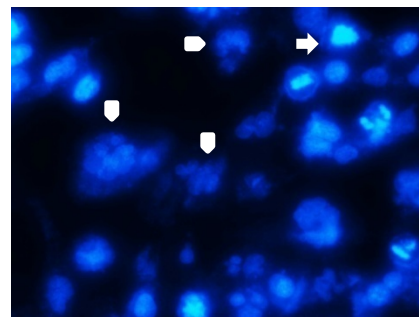

**24HR**

**48HR**

**72HR**

**B**

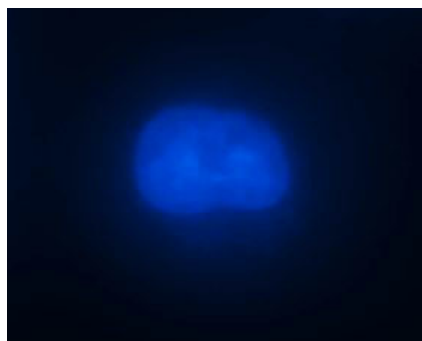

**NORMAL**

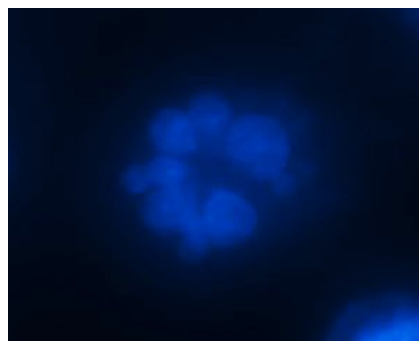

**MITOTIC CATASTROPHE**

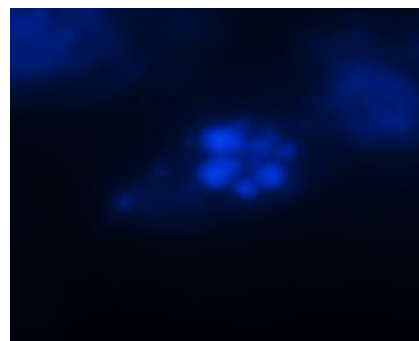

**APOPTOSIS**

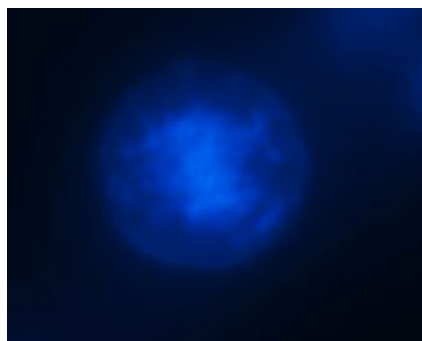

**PROPHASE**

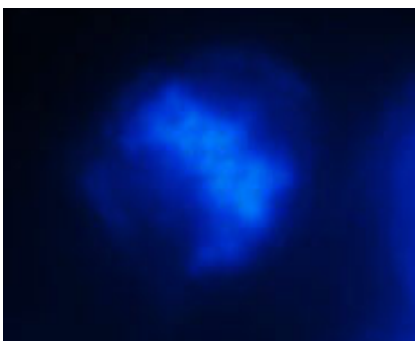

**METAPHASE**

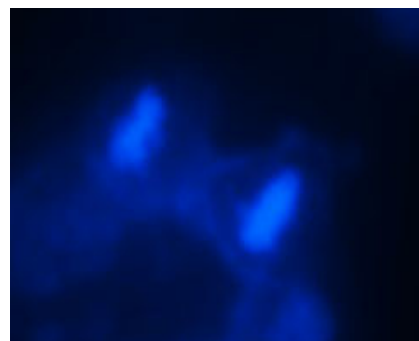

**TELOPHASE**
