# Supplementary material
Source: PubMed Central journal article supplement (PMC3756473)
Supplement: NIHMS504452-supplement-Suppl_Methods_and_Legends.pdf [file NIHMS504452-supplement-Suppl_Methods_and_Legends.pdf]

Supplemental Methods and Figure Legends for the Following Manuscript:

## MARCKS Regulates Growth, Radiation Sensitivity and is a Novel Prognostic Factor for Glioma

John S. Jarboe,<sup>1, 2</sup> Joshua C. Anderson,<sup>1</sup> Christine W. Duarte,<sup>3</sup> Tapan Mehta,<sup>3</sup> Somaira Nowsheen,<sup>1</sup> Patricia H. Hicks,<sup>1</sup> Alexander C. Whitley,<sup>1</sup> Timothy D. Rohrbach,<sup>1, 4</sup> Raymond O. McCubrey,<sup>3</sup> Sherard Chiu,<sup>5</sup> Tamara M. Burleson,<sup>1</sup> James A. Bonner,<sup>1</sup> G. Yancey Gillespie,<sup>6</sup> Eddy S. Yang,<sup>1</sup> and Christopher D. Willey,<sup>1, 2, 7</sup>

<sup>1</sup> The Department of Radiation Oncology, The University of Alabama at Birmingham, Birmingham, AL 35249, USA

<sup>2</sup> The Department of Biochemistry and Molecular Genetics, The University of Alabama at Birmingham, Birmingham, AL, USA

<sup>3</sup> Section on Statistical Genetics, The Department of Biostatistics, The University of Alabama at Birmingham, Birmingham, AL, USA

<sup>4</sup> The Department of Immunology, The University of Alabama at Birmingham, Birmingham, AL, USA

<sup>5</sup> The School of Medicine, The University of Alabama at Birmingham, Birmingham, AL, USA

<sup>6</sup> The Division of Neurosurgery, Department of Surgery, The University of Alabama at Birmingham, Birmingham, AL, USA

<sup>7</sup> The Department of Department of Cell, Developmental and Integrative Biology, The University of Alabama at Birmingham, Birmingham, AL, USA

Running Title: MARCKS Regulates GBM Growth and is Prognostic in Patients

**Contact:** Corresponding Author: Christopher D. Willey, M.D., Ph.D.

619 19<sup>th</sup> St. South

HSROC 2232C

Birmingham, AL 35249

[cwilley@uab.edu](mailto:cwilley@uab.edu)

Phone: 205-934-5670

Fax: 205-975-0784

## **SUPPLEMENTARY MATERIAL**

### **SUPPLEMENTARY METHODS**

#### **Immunoblotting**

Protein concentration was determined using the Pierce BCA protein assay kit (Thermo Scientific). All samples were electrophoresed through reducing SDS-polyacrylamide gels and electroblotted onto PVDF membranes (Immobilon). Membranes were blocked in phosphate buffered saline (PBS) containing 2% BSA and 0.1 % Tween-20 for one hour at 25°C and incubated with primary antibodies at 1:1000 dilution. Once washed, membranes were incubated with secondary antibody at 1:5000 (donkey anti-rabbit IgG-HRP, Jackson ImmunoResearch Laboratories, catalog # 711-035-152) and reactivity was detected using ECL chemiluminescent kits (Pierce, Rockford, IL) according to manufacturer's directions. The developed films were scanned using an Epson Perfection V500 Photo Scanner. Densitometry was performed using the program UN-SCAN-IT Gel using logarithmic analysis.

#### **Plasmid constructs**

The pCMV-MARCKS-WT-GFP plasmid (Origene # RG210277) and the pLenti4/V5-DEST plasmid (Invitrogen # V498-10) were digested with NdeI (catalog # R0111, New England Biolabs) and MluI (catalog # R0198, New England Biolabs) to generate the insert containing the MARCKS coding sequence and the appropriate vector backbone. The vector was then treated with Antarctic Phosphatase (catalog # M0289, New England Biolabs) overnight. The digested fragments were gel purified (catalog # 28704, Qiagen) and the MARCKS insert was ligated into the plenti4/V5-DEST vector. The resulting lentiviral transfer vector was designated pLenti4-MARCKS. The empty vector control plasmid was generated by digesting pLenti4/V5-DEST with XbaI (catalog # R0145, New England Biolabs) to remove the attR1-CmR-ccdB-attR2 sequence. The digested fragments were treated with Klenow fragment (catalog # M0120, New England

Biolabs), gel purified, and the resulting vector was ligated closed to generate the pLenti4-DELTA plasmid. Ligations were performed with T4 DNA Ligase (catalog # 15224-017, Invitrogen) at 16°C overnight. The ligation reactions were transformed into OneShot Stbl3 Chemically Competent Cells (catalog # C7373-03, Invitrogen) and plated onto LB agar containing 100µg/mL ampicillin. DNA Miniprep (catalog # 27104, Qiagen) and Maxiprep (catalog # 12262, Qiagen) kits were used for plasmid purification. Constructs were sequenced at the UAB Center for AIDS Research DNA Sequencing Core.

### **Lentiviral Vector Production**

293FT cells were cultured to 90% confluence, harvested and counted with a hemacytometer. 27µL of Lipofectamine 2000 (catalog # 11668, Invitrogen) was mixed in 1.5mL of Opti-MEM (catalog # 11058, Invitrogen) and incubated at room temperature for 5 minutes. 4µg each of psPAX2, pCMV-VSV-G, and the appropriate lentiviral vector transfer plasmid were mixed in 1.5mL of Opti-MEM. The plasmid and lipofectamine media was mixed and allowed to incubate for 20 minutes at room temperature.  $15 \times 10^6$  cells were plated in 10mL of DMEM supplemented with 10% FBS without antibiotics onto a 10cm dish coated with poly-D-lysine (catalog # P7886, Sigma). The Lipofectamine-plasmid complexes were added in a drop-wise fashion to the cells prior to adherence and the cells were allowed to attach overnight. The next morning the media was replaced with fresh DMEM supplemented with 10% FBS and 1% Pen-Strep. Lentiviral supernatants were harvested at 24 hours, filtered through a 0.45µm filter, aliquoted and stored at -80°C. Aliquots of lentivirus were quantified using the QuickTiter p24 ELISA (Cell Biolabs, Inc.).

### **Cell Culture and Stable Cell Line Selection**

$1 \times 10^5$  U251 and  $2 \times 10^5$  U87 cells were plated in 6 well plates and allowed to adhere overnight. The next morning, 75ng of p24 quantified lentiviral particles containing MARCKS shRNA, or 94ng containing a wild type MARCKS expression construct and their appropriate control viruses were used to infect U251 or U87, respectively, in a 500 $\mu$ L volume for 2 hours at 37°C in 5% CO<sub>2</sub>. After 2 hours the media containing the lentiviral particles was aspirated and replaced with 2mL of fresh media. The cells were allowed to incubate for 72 hours then re-plated into a 10cm dish. After adherence, the media on the infected U251 cells was replaced with 1 $\mu$ g/mL Puromycin and allowed to select for 2 passages before frozen stocks were prepared. The infected U87 cells were expanded to three 10cm dishes and a dose titration of 25, 50, and 100 $\mu$ g/mL of Zeocin was used to select for the highest over-expressing cells. A plate of U251 and a plate of U87 wild-type cells were used as a control to ensure a sufficient antibiotic concentration. After selection of the transformed U87 cells, the 10cm dish containing cells selected with 25 $\mu$ g/mL Zeocin were harvested for the proliferation assay and western blot. To increase MARCKS levels, the infected cells were selected with higher levels of Zeocin (100 $\mu$ g/mL), were imaged, and quantified as described below.

### **Cell size quantification**

20 random fields were captured at 10x magnification on an EVOS fl digital inverted microscope (AMG). The size of 20 cells was determined using ImageJ by tracing the border of each cell with the freehand selection tool and using the Analyze > Measure function. Mean and standard error were then calculated.

### **Senescence associated beta-galactosidase stain**

Staining for senescence associated beta-galactosidase (SA- $\beta$ -Gal) was performed on 10cm dishes of the U87 cells transformed with empty vector control or the MARCKS over-expression

lentivirus after selection with 100µg/mL Zeocin as described above. The Senescence  $\beta$ -Galactosidase Staining Kit (Catalog #9860, Cell Signaling) was used according to manufacturer's protocol. Images were captured at 20x magnification with an AxioCam MRc5 on a Zeiss Observer.A1 microscope. Senescence was quantified by counting the percentage of SA- $\beta$ -Gal positive cells in 15 fields at 10x magnification. Mean and standard error were then calculated.

### **Mitotic catastrophe**

$4 \times 10^5$  cells were plated in 6-well plates and allowed to adhere overnight. The cells were then treated with 8 Gy radiation and fixed at 24, 48 and 72 hours with 4% paraformaldehyde. The cells were then stained with 300ng/mL DAPI for 10 minutes and washed 3 times with PBS. Images were captured at 40x magnification on an EVOS fl digital inverted microscope (AMG). Cells with the presence of more than one nucleus within the same cell were designated as undergoing mitotic catastrophe (see Supplementary Fig. S4). 15 fields were counted and mean and standard error were then calculated.

### **Apoptosis**

$4 \times 10^5$  cells were plated in 6-well plates and allowed to adhere overnight. The cells were then treated with 8 Gy radiation and fixed at 24, 48 and 72 hours with 4% paraformaldehyde. The cells were then stained with 300ng/mL DAPI for 10 minutes and washed 3 times with PBS. Images were captured at 40x magnification on an EVOS fl digital inverted microscope (AMG). Cells with condensed, pyknotic, and fragmented nuclei were counted as apoptotic (see Supplementary Fig. S4A). These were distinguished from mitotic figures by the presence of condensed chromosomes (Supplementary Fig. S4B). 15 fields were counted and mean and standard error were then calculated.

## **Cell Cycle Analysis**

1x10<sup>5</sup> U251 control and MARCKS knockdown cells were plated in 6-well dishes in triplicate and allowed to adhere overnight. The following day the cells were irradiated with 8 Gy. The cells were harvested by trypsinization at the indicated time points, the trypsin was neutralized with media and the cells were collected by centrifugation at 1000rpm for 10 minutes. The cells were re-suspended in 1mL of cold PBS and were then fixed with the addition of 4ml of -20°C ethanol at 4°C overnight. The next day, the cells were again collected by centrifugation and the fixative was aspirated. The cells were then re-suspended in 300µL PBS + 1µL RNase (25mg/mL) and incubated at 37 degrees Celsius for 30 minutes. 30µL propidium iodide (in PBS 100µg/mL final concentration) was added to each sample. Flow cytometry was performed at the UAB Flow Cytometry Center for Aids Research (CFAR) Core.

## **DNA Damage Quantification**

U251 MARCKS knockdown and control cells were cultured and seeded on sterile cover slips, allowed to attach overnight, and subsequently treated with mock or 8 Gy using a 320 kV X-ray irradiator (Kimtron Inc., Woodbury, CT). At the appropriate time points, cells were rinsed in PBS and incubated for 5 minutes at 4°C in ice-cold cytoskeleton buffer (10mM HEPES/KOH, pH 7.4, 300mM sucrose, 100mM NaCl, 3mM MgCl<sub>2</sub>) supplemented with 1mM PMSF, 0.5mM sodium vanadate and proteasome inhibitor (Sigma, 1:100 dilution) followed by fixation in 70% ethanol for 15 minutes. The cells were blocked and incubated with primary antibodies (1:500 dilution, phospho-H2AX Ser139, Millipore, catalog # MI-07-164). The secondary antibody was anti-rabbit Alexa Fluor 594–conjugated antibody (1:2000 dilution; Invitrogen). DAPI (Invitrogen, catalog # D21490) was used for nuclear staining. The cover slips were subsequently mounted onto slides with mounting media (Aqua poly mount, Polysciences, Inc. catalog # 18606) and analyzed via fluorescence microscopy (Carl Zeiss, Thornwood, NY). Positive and negative controls were

included on all experiments. A total of 500 cells were assessed. For foci quantification, cells with greater than 10 foci were counted as positive according to the standard procedure (1-3).

### **Survival analysis**

For the REMBRANDT data, gene expression for MARCKS was calculated as the average over the normalized intensity values for five MARCKS probes (201668\_x\_at, 201669\_s\_at, 201670\_s\_at, 213002\_at, and 225897\_at) and dichotomized at the median expression level. Survival in months was modeled with a Cox proportional hazards model using the `coxph` routine in the `Survival` package (version 2.35-7) in R (version 2.10.0). Kaplan-Meier curves for dichotomized MARCKS expression were generated using predicted survival times from the Cox model using the `survfit` function from the `survival` package. For the TCGA data, gene expression data that has been summarized by gene and across three platforms was obtained as previously described (4). Survival data was obtained using the “days\_to\_death” calculated field from the TCGA data portal after filtering out patients with prior glioma (<http://tcga-data.nci.nih.gov/tcga/tcgaHome2.jsp>). MGMT methylation status was kindly provided by Neil Hayes at UNC, and GBM subtype was assigned as previously described (4). Cox proportional hazards models were fit using the `coxph` routine in the `Survival` package (version 2.35-7) in R (version 2.10.0). We summarized the model fit using estimates of the hazard ratio (HR) for each term along with 95% confidence intervals for the effect estimates, as well as p-values for testing the null hypothesis of no effect. Model  $R^2$  and adjusted  $R^2$  given age were calculated to account for censoring using a formula given in (van Wieringen et al., 2009) (5),

$$R^2 = 1 - \exp(-2/n) (l(\beta) - l(0))$$

where  $n$  is the sample size,  $l(\beta)$  is the likelihood of the full model, and  $l(0)$  is the likelihood of the reduced model (either null model or model with just age). Kaplan-Meier curves for MARCKS quartiles or other expression categories were generated by predicting the survival times from

the Cox model at the median age value. This was implemented using the `survfit` function from the survival package. The proportional hazards assumption was evaluated graphically using the Kaplan-Meier curves and tested using the `cox.zph` function (6). We found no evidence of proportional hazards violation for MARCKS quartiles or other expression categories. Median survivals were determined from the Kaplan-Meier curves using the program UN-SCAN-IT.



## SUPPLEMENTARY TABLES

**Supplementary Table 1**

| <b>Tumor ID</b> | <b>EGFR Amplification</b> | <b>PTEN Status</b> | <b>TP53 Status</b> | <b>MGMT Methylation</b> | <b>IC Tumor Growth (Days)</b> | <b>Radiation Sensitive</b> |
|-----------------|---------------------------|--------------------|--------------------|-------------------------|-------------------------------|----------------------------|
| GBM 6           | Yes (vIII)                | WT                 | R273C              | No                      | 52                            | YES                        |
| GBM 10          | No                        | Null               | WT                 | No                      | 55                            | NO                         |
| GBM 12          | Yes (WT)                  | WT                 | Exon 2 splice      | Yes                     | 28                            | NO                         |
| GBM 14          | No                        | Exon 1 (2bp)       | WT                 | Yes                     | 33                            | YES                        |
| GBM 15          | Yes (WT)                  | WT                 | WT                 | Yes                     | 63                            | YES                        |
| GBM 22          | No                        | WT                 | R273C              | Yes                     | 43                            | NO                         |
| GBM 39          | Yes (vIII)                | WT                 | WT                 | Yes                     | 31                            | YES                        |
| GBM 59          | Yes (vIII)                | Null               | WT                 | Yes                     | 46                            | YES                        |

**Supplementary Table 1.** Human glioblastoma xenoline characteristics. EGFR=Epidermal Growth Factor Receptor; PTEN=Phosphatase and tensin homolog; TP53=tumor protein 53; MGMT=O<sup>6</sup> methylguanine-DNA methyltransferase; IC= intracranial; WT=wild type; vIII= EGFR vIII variant; bp= base pair. Radiation sensitivity testing for these lines has already been published (7) but is summarized in the table.

**Supplementary Table 2**

| Model                                              | Sample    | R <sup>2</sup> | R <sup>2</sup>  age | Term      | HR   | L    | U     | P      |
|----------------------------------------------------|-----------|----------------|---------------------|-----------|------|------|-------|--------|
| <b>MARCKS continuous</b>                           | All       | 17.96%         | 2.00%               | Age       | 1.03 | 1.02 | 1.04  | <.0001 |
|                                                    |           |                |                     | MARCKS    | 0.77 | 0.59 | 0.99  | 0.04   |
|                                                    | Proneural | 35.19%         | 14.06%              | Age       | 1.05 | 1.02 | 1.06  | <.0001 |
|                                                    |           |                |                     | MARCKS    | 0.46 | 0.26 | 0.77  | 0.003  |
|                                                    | Classical | 46.57%         | 44.83%              | Age       | 1.01 | 0.99 | 1.03  | 0.23   |
|                                                    |           |                |                     | MARCKS    | 0.84 | 0.47 | 1.47  | 0.54   |
|                                                    | Neural    | 16.12%         | 3.17%               | Age       | 1.04 | 0.99 | 1.08  | 0.07   |
|                                                    |           |                |                     | MARCKS    | 0.86 | 0.20 | 3.57  | 0.83   |
| Mesenchymal                                        | 37.89%    | 15.71%         | Age                 | 1.04      | 1.01 | 1.07 | 0.003 |        |
|                                                    |           |                | MARCKS              | 0.65      | 0.32 | 1.28 | 0.21  |        |
| <b>MARCKS quartiles</b>                            | Proneural | 46.07%         | 28.49%              | Age       | 1.06 | 1.03 | 1.07  | <.0001 |
|                                                    |           |                |                     | MARCKS Q2 | 1.80 | 0.81 | 3.98  | 0.15   |
|                                                    |           |                |                     | MARCKS Q3 | 1.39 | 0.64 | 3.00  | 0.40   |
|                                                    |           |                |                     | MARCKS Q4 | 0.28 | 0.11 | 0.70  | 0.01   |
| MARCKS quartiles (Q4 vs. Q1-Q3)                    | Proneural | 43.90%         | 25.61%              | Age       | 1.06 | 1.03 | 1.08  | <.0001 |
|                                                    |           |                |                     | MARCKS>Q4 | 0.21 | 0.09 | 0.48  | 0.0002 |
| MARCKS quartiles (Q4 vs. Q1-Q3)<br><b>Add MGMT</b> | Proneural | 63.17%         | 51.16%              | Age       | 1.06 | 1.03 | 1.08  | <.0001 |
|                                                    |           |                |                     | MGMT      | 1.48 | 0.77 | 2.86  | 0.24   |
|                                                    |           |                |                     | MARCKS>Q4 | 0.18 | 0.07 | 0.45  | <.0001 |
| MARCKS (Q4 vs. Q1-Q3)<br><b>Unmethlyated</b>       | Proneural | 47.38%         | 32.82%              | Age       | 1.07 | 1.03 | 1.10  | <.0001 |
|                                                    |           |                |                     | MARCKS>Q4 | 0.11 | 0.03 | 0.39  | <.0001 |
| MARCKS (Q4 vs. Q1-Q3)<br><b>Methlyated</b>         | Proneural | 44.97%         | 12.48%              | Age       | 1.06 | 1.01 | 1.11  | 0.01   |
|                                                    |           |                |                     | MARCKS>Q4 | 0.39 | 0.09 | 1.56  | 0.19   |

**Supplementary Table 2.** Various Cox Proportional Hazards models for survival outcome as a function of MARCKS expression (continuous or dichotomized using quartiles), age, MGMT status (as a covariate or a stratifying factor), and GBM subtype (as a stratifying factor). Model statistics include total explained variance (R<sup>2</sup>), additional explained variance after correcting for age (R<sup>2</sup>|age), and hazard ratio with upper and lower confidence bounds and p-value for each term in the model (HR, L, U, and p, respectively).

## **SUPPLEMENTARY FIGURE LEGENDS**

**Supplementary Figure 1. GBM proliferation rates.** Proliferation was determined for each cell line using a WST-1 cell proliferation assay as described in the Methods.

**Supplementary Figure 2. MARCKS knockdown and radiation sensitivity.** Immunoblotting for activation of Akt in the U251 MARCKS knockdown cell line treated with 10 $\mu$ M of LY294002 for 1 hour (A). Proliferation was measured with the MARCKS knockdown cells treated with LY294002 (B). Representative photos of colonies formed for control and knockdown U251 cells with radiation dose and number of cells plated indicated below each photo (C). (\*,  $p = 0.0287$ )

**Supplementary Figure 3. DNA repair and cell cycle.** Immunoblotting of the U251 MARCKS cell line treated with 10 $\mu$ M LY294002 and 8 Gy radiation (A). A table of the distribution of the cell cycle phases in our control and knockdown cell line in the basal state and after 8 Gy radiation (B). A graph of the percent of the total population versus the phase of cell cycle with significance noted (\* =  $p < 0.05$ , \*\* =  $p < 0.01$ , \*\*\* =  $p < 0.001$ , \*\*\*\* =  $p < 0.0001$ )(C).

**Supplementary Figure 4. Mitotic catastrophe and apoptosis.** Representative photos of the U251 MARCKS knockdown and control cell lines at 24, 48, and 72 hours after 8 Gy radiation. The arrow heads indicate apoptotic nuclei. The block arrows denote cells undergoing mitotic catastrophe (A). Representative photos of a normal nucleus, a nucleus undergoing mitotic catastrophe, a pyknotic nucleus, and nuclei undergoing several phases of mitosis (B).

### **Supplemental References:**

1. Nowsheen S, Bonner JA, Yang ES. The poly(ADP-Ribose) polymerase inhibitor ABT-888 reduces radiation-induced nuclear EGFR and augments head and neck tumor response to radiotherapy. *Radiother Oncol.* 2011;99:331-8.

2. Yang ES, Wang H, Jiang G, Newshean S, Fu A, Hallahan DE, et al. Lithium-mediated protection of hippocampal cells involves enhancement of DNA-PK-dependent repair in mice. *J Clin Invest.* 2009;119:1124-35.
3. Yang ES, Newshean S, Wang T, Thotala DK, Xia F. Glycogen synthase kinase 3beta inhibition enhances repair of DNA double-strand breaks in irradiated hippocampal neurons. *Neuro Oncol.* 2011;13:459-70.
4. Verhaak RG, Hoadley KA, Purdom E, Wang V, Qi Y, Wilkerson MD, et al. Integrated genomic analysis identifies clinically relevant subtypes of glioblastoma characterized by abnormalities in PDGFRA, IDH1, EGFR, and NF1. *Cancer Cell.* 2010;17:98-110.
5. van Wieringen WN, Kun D, Hampel R, Boulesteix AL. Survival prediction using gene expression data: A review and comparison. *Computational Statistics & Data Analysis.* 2009;53:1590-603.
6. Grambsch PM, Therneau TM. Proportional hazards tests and diagnostics based on weighted residuals. *Biometrika.* 1994;81:515-26.
7. Sarkaria JN, Carlson BL, Schroeder MA, Grogan P, Brown PD, Giannini C, et al. Use of an orthotopic xenograft model for assessing the effect of epidermal growth factor receptor amplification on glioblastoma radiation response. *Clin Cancer Res.* 2006;12:2264-71.
